# Supplementary material for: Protein adsorption in static microsystems: effect of the surface to volume ratio
Source: Royal Society of Chemistry journal article supplement (doi:10.1039/b411179f), 2004-12-21
Supplement: b411179f.doc [file b411179f.doc]

### Protein Adsorption in Static Microsystems: Effect of the Surface to Volume Ratio.

### Supporting Information (SI).

*Andrea Lionello, Jacques Josserand, Henrik Jensen, Hubert H. Girault**

Laboratoire d’Electrochimie Physique et Analytique, Institut des Sciences et Ingénierie Chimiques (ISIC),

Ecole Polytechnique Fédérale de Lausanne, CH-1015 Lausanne, Switzerland

*Corresponding author: (e-mail) [hubert.girault@epfl.ch](mailto:hubert.girault@epfl.ch); (phone) + 41 693 31 51; (fax) + 41 21 693 36 67.

**SI Index**

**page S-2 – Theory: Diffusion-adsorption in the present model.**

**page S-3 – Numerical Technique.**

**page S-3 – Calibration in semi infinite diffusion system (short times).**

**page S-4 – Experimental section: Microchannel fabrication**

**page S–5 Instrumentation.**

**page S-6 – Results and Discussion: Depletion effect.**

**Theory**

**Diffusion-adsorption (present model).** The evolution of *C* and  in the present FEM model is calculated by the following set of equations, which are applied to the 2-D geometry described in Fig. 1-paper. Note that the boundary condition (6-paper) is introduced in (5-paper) as a consumption term assigned to the active wall, leading to eq. (SI2). The second term of eq. (SI2) equals zero in the bulk.

(SI1)

(SI2)

The notation  = /** is here introduced to homogenise the dimensions of the two sides of eq. (SI1) and (SI2), ** representing the thickness of the active wall (see Fig. 1-paper). Because of the introduction of **,  is given in molm-3 instead of molm-2. These equations are applied to the 1-D and 2-D geometries described on Fig. 1-paper.

The integral form of the model is here derived using the Galerkin's formulation (multiplication by a projective function **p and integration on the domain of study, ).

(SI3)

By decomposing the product between **p and the divergence, the second order derivative of (SI3) (divergence of the gradient) becomes:

(SI4)

Applying (SI4) in (SI3) and using the Ostrogradsky theorem, the divergence term is rejected at the boundary of (SI5-6), where it expresses the flux boundary condition of each species (here equal to zero, *i.e.* no flux at the boundaries of the domain).

(SI5)

(SI6)

**Numerical Technique.** The finite element software Flux-Expert™ (Astek Rhône-Alpes, Grenoble, France) is performed on a Silicon Graphics Octane 2 Unix workstation. The model is formulated in a 2-D Cartesian form and calculations are performed in 1-D and 2-D geometries as shown in Fig. 1(a)-paper and (b)-paper. The model presents 2 regions: the channel containing the bulk solution and the adsorption wall. In the channel, the analyte is characterised by its diffusion coefficient *D*. max, *k*on and *k*off are assigned to the thin active wall.

It must be stressed that the adsorption wall has a dimension **, elongated to homogenise the mesh size and to reduce the computational time: in this wall, the diffusion coefficient *D* is adapted to insure a uniform surface concentration  at any time during the calculation. In what follows,  will be used to respect the physical meaning, even if  was used for all the calculations. The active layer is always 1 mesh thick.

**Calibration in semi infinite diffusion system (short times).** In order to make the comparison, the dimensionless time ** is introduced:

(SI7)

As shown in Fig. SI1, the time evolution of the dimensionless surface concentration /eq versus ** 1/2 is in a good agreement with the analytical model1 for ** ranging from 0.1 to 10. It also illustrates that the time to reach equilibrium coverage decreases with the initial concentration *C°* (*i.e.* with **, which has been called “the motivating force to adsorption”1). The values of *k*off that insure a diffusion limited regime of adsorption have been estimated. The value 100 sec-1 is chosen for further diffusion limited calculations, as the plot of  shows a difference of 0.6% compared with the case *k*off = 10 sec-1 at 6 seconds (not shown).

The comparison is good as long as we are in semi-infinite conditions, *i.e.* up to 6 seconds.

Experimental section

### Microchannel fabrication. As already described,2, 3 the poly(ethylene terephthalate) (Melinex PET, 100 m thick) is exposed to an ArF excimer laser beam in order to define a 50 m deep cavity. The channel structure is then sealed with PET/polyethylene (PET/PE) lamination. The channels are 50  200 m in cross section and 1.5 cm long. The photoablated PET presents the useful ability to generate electroosmotic flow and also these important characteristics for fluorescence detection: a) pronounced transparency to the light used to excite the labelled antibody and to the fluorescence; b) the debris produced by the laser ablation are easily removable and, however, don't generate important fluorescent noise. For PET, a surface capacity for antibody adsorption 4-fold higher than for PE has been measured:2 consequently, in the geometry of Fig. 1b-paper, adsorption on PE has been neglected. The PET adsorbing wall is on the bottom, the right and the left parts of the channel.

**Instrumentation.** The chips were placed on the *XY* moving plane. This is made up by a micropositioner stage (Newport, 2 cm range, 10m step) for the *Y* direction, and a DC-Motor controlled translational stage for the *X* direction (M.415 DG, GMP controlled by a C842.20 DC-Motor controller, with 16cm range, 0.1 m step) controlled by an operating software running on Windows (C-842 WinMove). A motor-controlled stage of the same kind was used for the *Z* direction. Excitation light from a diode laser (630 nm, Melles Griot) was focused on a 200 m pinhole, then passed through a 575-625 nm band pass filter, reflected by a dichroic mirror, focused onto the chip to a  20 m spot. A 0.6 N.A., 40 infinite conjugate, microscope objective (LD Achroplan, Zeiss) was used. The fluorescence emission was collected by the same objective, passed through the dichroic mirror, a 660-710 nm band pass filter and focused onto a 800 m pinhole.4 The band pass filters and the dichroic mirror constitute the filter set n° 26 by Zeiss. A photomultiplier tube (PMT Hamamatsu H6240-01) was mounted on top of the microscope tube with a 670/10 nm interference filter (03FIL054 Melles Griot). Signals from the PMT were recorded with a program written in LabView.

Confocal microscopy is useful to detect the small concentrations occurring in this system. In fact, all the light coming from the planes not confocal to the pinholes and causing background is rejected by the pinholes: in this way, the signal-to-background ratio is enhanced. The sample preparation is quick and the analysis easy. It is just limited by the optical characteristics of the system, like the transparency of the substrate; anyway, the range of materials in which the microscope can be used is wide, spreading from glass to different kinds of polymers (PET, polystyrene, cellulose acetate, on which it has been tested).

Results and Discussion

Depletion effect (long times). After 6 seconds, the solute starts to be depleted because of the microdimensions of the geometry (the present model is 200 m high). This phenomenon is illustrated in Fig. SI2a, showing the variation of *C/C°* with the distance from the wall (*y*) for different times after the beginning of the adsorption and for the same parameters as Fig. SI1 (diffusion control). Concentration depletion extends to the whole height after 10 seconds. At 100 seconds the equilibrium is reached: *C*eq is about 82% of *C°* (instead of *C*eq = *C°* as in a semi-infinite system). Consequently the concentration at equilibrium in eq. (4)-paper, *C*eq, is not equal to *C°* any longer, and this equation should be rewritten as:

(SI8)

The final value of eqsyst is therefore lower than the theoretical one attainable in a bigger system or in a system where the solution is renewed (e.g. with a flow).

The time evolution of /eq is shown in Fig. SI2b: it is illustrated that eqsyst (whose value can be calculated from eq. SI8) is reached instead of eqtheor (corresponding to eq of eq. (4)-paper).In Tab. SI1 the ratios eqsyst/max obtained in this system are compared with theoretical ones, eqtheor. We can observe that eqsyst is nearer the theoretical one at high ** (high *C°*) due to the lower bulk depletion.

To illustrate how the channel dimensions influence the adsorption, the ratio between the experimental and the theoretical coverage was plotted versus the height of the channel as shown in Fig. SI3. Fitting the results obtained by simulations with different channel heights (*i.e.* for different *h* in Fig. 1a-paper) leads to:

(SI9)

The parameters *a*1 and *a*2 are dependent on *C°* and the values are shown in Tab. SI1.

References:

(1) Reinmuth, W. H. *Journal of Physical Chemistry* **1961**, *65*, 473-&.

(2) Rossier, J. S.; Gokulrangan, G.; Girault, H. H.; Svojanovsky, S.; Wilson, G. S. *Langmuir* **2000**, *16*, 8489-8494.

(3) Roberts, M. A.; Rossier, J. S.; Bercier, P.; Girault, H. *Analytical Chemistry* **1997**, *69*, 2035-2042.

(4) Ocvirk, G.; Tang, T.; Harrison, D. J. *Analyst* **1998**, *123*, 1429-1434.

**Figure SI1.** Time evolution of the wall concentration given as eq: plots of the simulation (markers) compared with the results of Reinmuth (lines)1 for a semi-infinite linear diffusion controlled system. The parameters are *D* = 5  10-10 m2sec-1, max = 3.5  10-11 molm-2, *K* = 2.5  106 m3mol-1 (*k*on = 2.5  108 m3mol-1sec-1, *k*off = 100 sec-1). *C°* = 4  10-8, 4  10-7, 4  10-6 molm-3 for ** = 0.1, 1, 10 respectively.

**(a)**

**(b)**

**Figure SI2. (a)** Variations of *C/C°* with distance from the active wall (*y*) for different times (in seconds) after the beginning of adsorption. *C°* and the other parameters are the same than in Fig. SI1. **(b)** Time evolution of  in a microsystem showing that eqtheor is not reached.

**Figure SI3.**  Calculated coverage normalised by the theoretical value versus the channel height for different concentrations (expressed as **). All the parameters are those of Fig.SI1.

| ** |  |  | difference | *a*1 | *a*2/m-1 |
| --- | --- | --- | --- | --- | --- |
| 10 | 9.09  10-1 | 9.02  10-1 | -0.77 % | 1 | 3.410-2 |
| 1 | 5  10-1 | 4.51  10-1 | -9.8 % | 0.93 | 2.210-2 |
| 0.1 | 9.09  10-2 | 6.66  10-2 | -26.7 % | 0.85 | 1.110-2 |

**Table SI1.** Comparison between the theoretical and the experimental eq/max reached in the microchannel of Fig. 1a-paper. The experimental eq/max is obtained from the simulations of Fig. SI1, at longer times. *a*1 and *b*2 are the coefficient for eq. (SI9).
